# Supplementary material for: Polycondensation of l-lactic acid: a deeper look into solid state polycondensation
Source: Royal Society of Chemistry journal article supplement (doi:10.1039/d4py01191k), 2025-01-01
Supplement: d4py01191k1.pdf [file d4py01191k1.pdf]

## Supplemental Information

to

### Polycondensation of L-Lactic Acid: A Deeper Look into Solid State Polycondensation

Hans R. Kricheldorf<sup>a)</sup>, Steffen M. Weidner<sup>b)</sup>, Felix Scheliga<sup>a)</sup>

a) Universität Hamburg, Institut für Technische und Makromolekulare Chemie,  
Bundesstraße 45, D20146 Hamburg, Germany

b) BAM – Bundesanstalt für Materialforschung und -prüfung, Richard Willstätter Str. 11,  
D-12489 Berlin, Germany

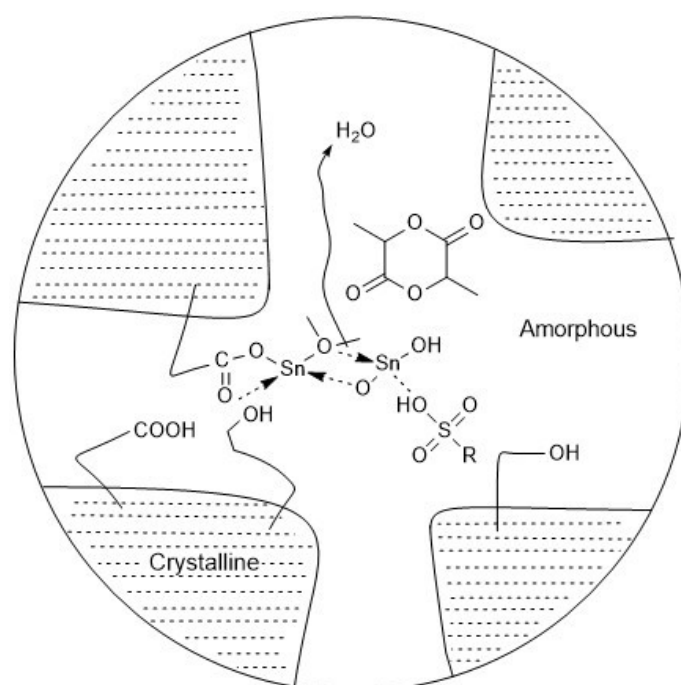

**Scheme S1** Scheme of reactions occurring in the amorphous phase of solid PLA as formulated by Moon et al. [16] (reproduced with permission from Elsevier)

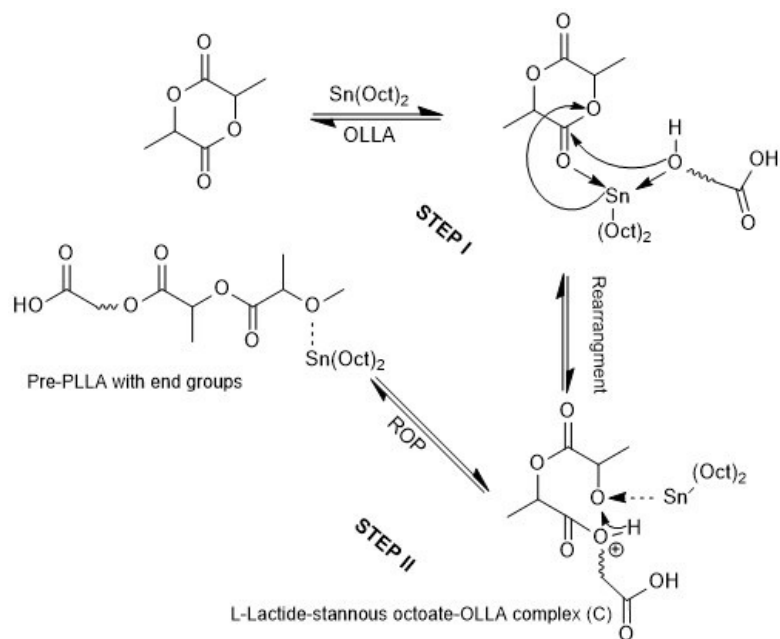

**Scheme 2** Reaction mechanisms postulated by Katyar et al. [21] (reproduced with permission from Wiley)

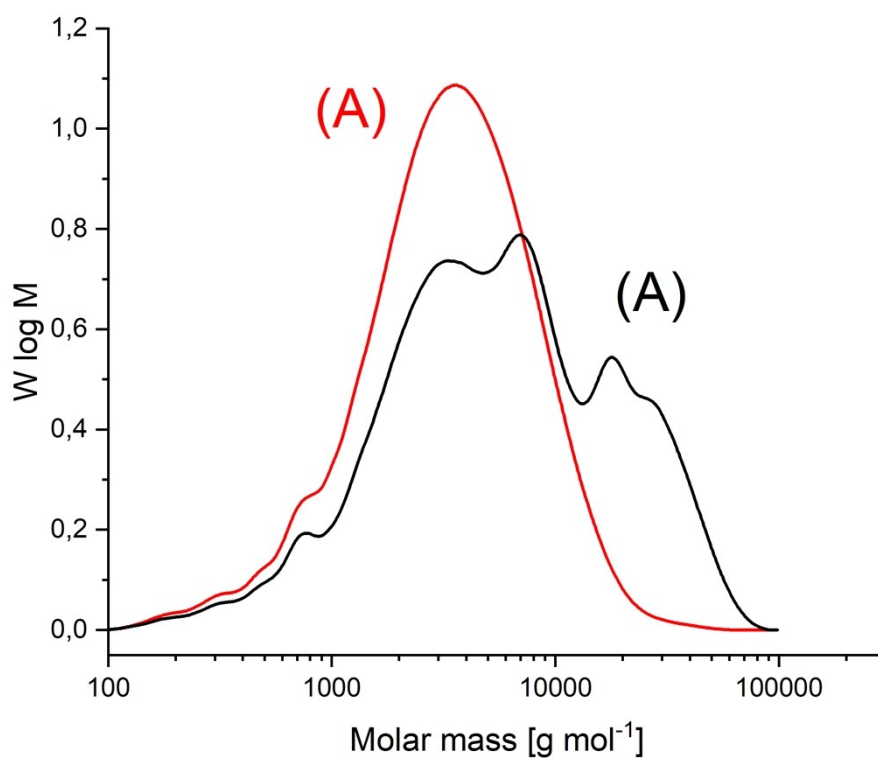

**Figure S1** GPC mass distribution curves of PLAs prepared by polycondensation of LA catalyzed by TSA: (A) after 2 d, (B) after 6 d

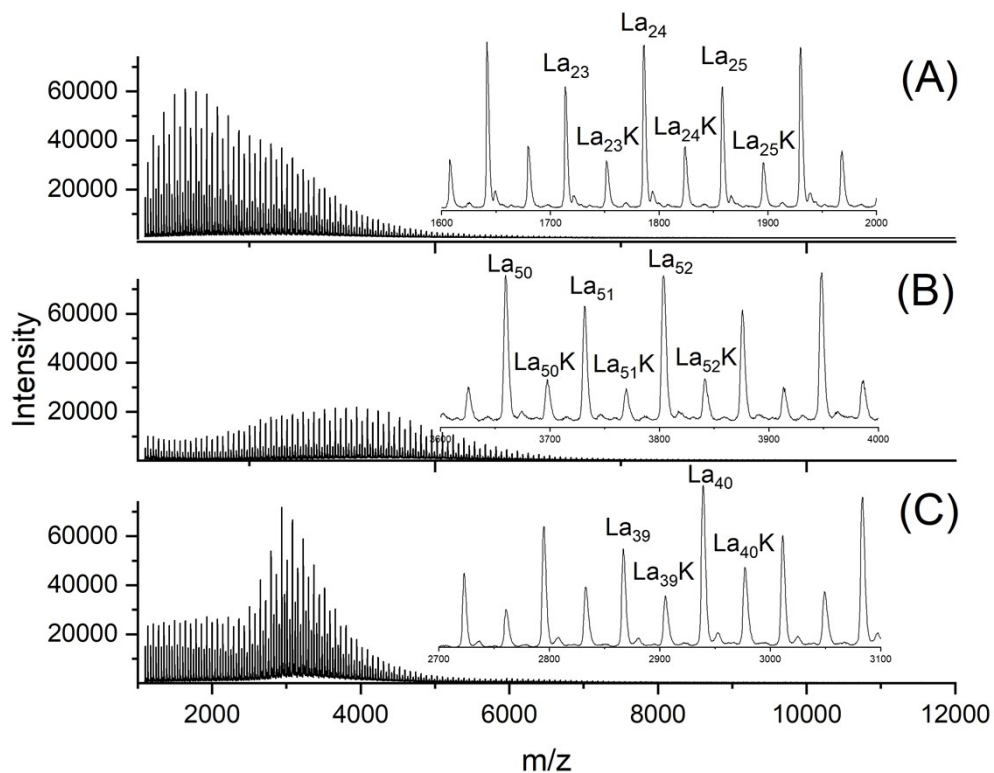

**Figure S2** MALDI TOF mass spectra of the starting materials: (A) HOPLA-12, (B) HOPLA-25, (C) HOPLA-50

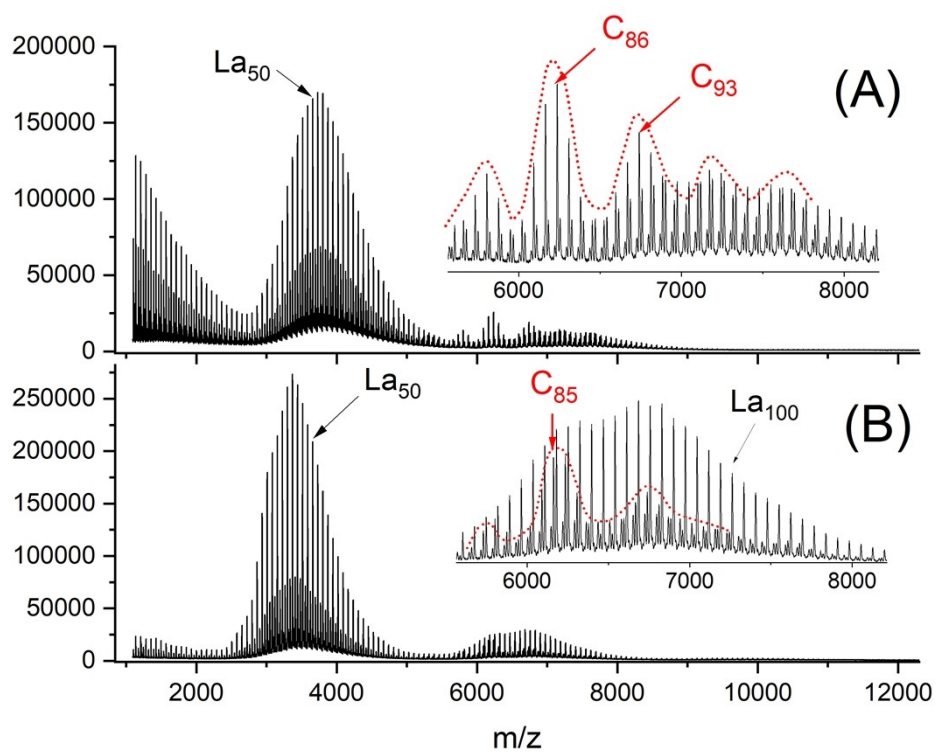

**Figure S3** MALDI TOF mass spectra of PLAs obtained by annealing of HOPLA-25 at 140 °C/14 d: (A) doped with  $SnO_2$ , (B) doped with TSA

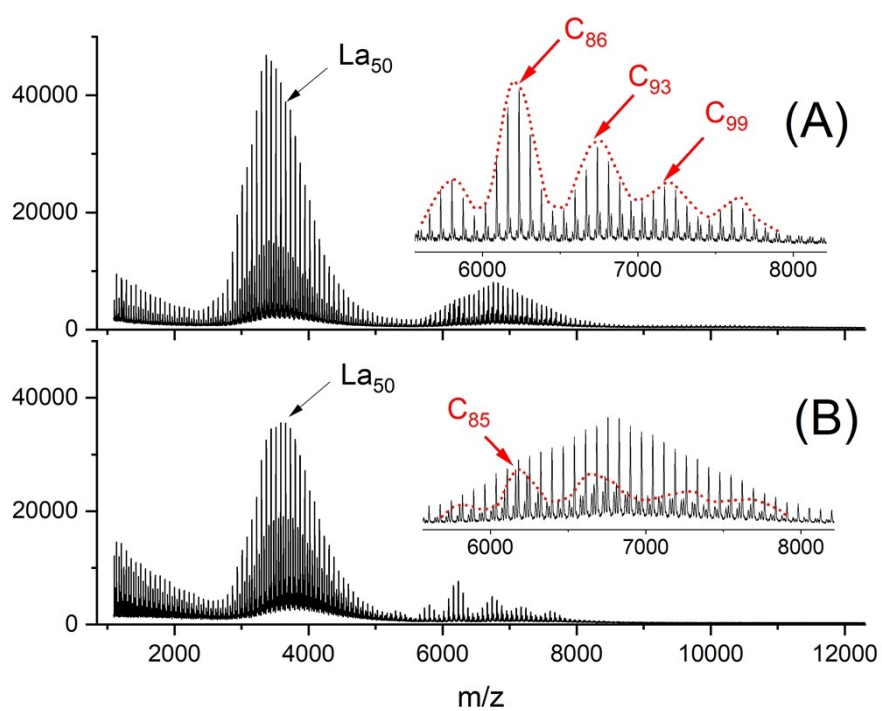

**Figure S4** MALDI TOF mass spectrum of PLA obtained by annealing of HOPLA-25 at 140 °C/14 d followed by annealing at 160 °C/6 d, (A) doped with  $\text{SnOct}_2$ , (B) doped with TSA
